# Supplementary material
Source: PubMed Central journal article supplement (PMC2945558)
Supplement: supp_M110.116681_jbc.M110.116681-1.pdf [file supp_M110.116681_jbc.M110.116681-1.pdf]

# Plasma membrane $\text{Ca}^{2+}$ -ATPase overexpression depletes both mitochondrial and endoplasmic reticulum $\text{Ca}^{2+}$ stores and triggers pancreatic $\beta$ -cell apoptosis

by

Lin Jiang, Florent Allagnat, Evrard Nguidjoe, Adama Kamagate, Nathalie Pachera, Jean-Marie Vanderwinden, Marisa Brini, Ernesto Carafoli, Décio L. Eizirik, Alessandra K. Cardozo and André Herchuelz

## Supplemental Research Design and methods

### Research Design and methods

#### Materials

RPMT-1640, L-glutamine, penicillin, streptomycin, foetal calf serum (FCS), G418, Lipofectamine, Zeocin<sup>TM</sup> and Hoechst 33342 were from Invitrogen (Merelbeke, Belgium). Coelenterazine wild-type (wt), *n* and *h*, MitoTracker<sup>®</sup> Green were from Molecular probe (Eugene, OR, U.S.A.). DePsipher<sup>TM</sup> was from TREVIGEN INC (Gaithersburg, MD, USA). Thapsigargin, cyclopiazonic acid (CPA), digitonin, propidium iodide and carbonyl cyanide 3-chlorophenylhydrazone (CCCP) and rabbit anti-tubulin were from Sigma Aldrich (Bornem, Belgium). Zeocin<sup>TM</sup> and Super Script<sup>TM</sup>, Dynabeads mRNA DIRECT<sup>TM</sup> kit, Alexa fluor 546 and anti-rabbit Alexa fluor 488-conjugated antibodies were from Invitrogen SA (Merelbeke, Belgium). Pwo DNA polymerase kit was from Roche Diagnostic GmbH. IQ<sup>TM</sup> SYBR Green Supermix was from BIO-RAD (Nazareth Eke, Belgium). Rabbit anti-BiP, anti-phospho PERK, anti-phospho-eIF2 $\alpha$ , anti-cleaved caspase 3, anti-Bcl-2 and anti- $\beta$ -actin were from Cell Signaling, Bioké, Leiden, The Netherlands. Rabbit anti-eIF2 $\alpha$  and anti-Bax were from Santa Cruz Biotechnology, Inc., Heidelberg, Germany. Monoclonal mouse anti-cytochrome c and anti-ATP-synthase- $\beta$  was from BD Biosciences Europe (Erembodegem, Belgium).

#### Pancreatic islets isolation

Rat pancreatic islets were isolated using the collagenase technique as previously described

(29).

### **Assessment of cell viability**

The percentage of viable, apoptotic and necrotic cells was determined using the DNA-binding dyes propidium iodide (PI, 5 µg/ml) and hoechst 33342 (HO, 5 µg/ml) as previously described (1).

### **mRNA extraction and quantitative RT-PCR**

Poly(A)<sup>+</sup> mRNA was isolated and reverse transcribed as previously described (2). Quantitative PCR was performed using the IQ<sup>TM</sup> SYBR Green Supermix, in an IQ5 instrument (BIO-RAD). Expression values were corrected to the housekeeping gene glyceraldehyde-3-phosphate dehydrogenase (GAPDH). CPA treatment does not modify GAPDH expression in insulin producing cells under the present experimental conditions (2).

### **Western Blot Analysis**

Cells were washed once with cold PBS and directly lysed with Laemmli buffer. Lysates were then resolved by SDS-PAGE and transferred to PVDF membrane. Immunoblot analyses were performed using the following antibodies : rabbit anti-PMCA2 (1/1000; Swant<sup>®</sup>, Bellinzona, Switzerland), rabbit anti-BiP (1/2000), anti-phospho PERK (1/1000), anti-phospho-eIF2 $\alpha$  (1/1000), anti-eIF2 $\alpha$  (1/2000), anti-Bax (1/10000), anti-cleaved caspase 3 (1/2000), anti-Bcl-2 (1/20000), anti-tubulin (1/10000) and anti- $\beta$ -actin (1/5000).

### **References**

1. Delaney CA, Pavlovic D, Hoorens A, Pipeleers DG, Eizirik DL: Cytokines induce deoxyribonucleic acid strand breaks and apoptosis in human pancreatic islet cells. *Endocrinology* 138: 2610-2614, 1997

2. Cardozo AK, Kruhøffer M, Leeman R, Orntoft T, Eizirik DL: Identification of novel cytokine-induced genes in pancreatic beta-cells by high-density oligonucleotide arrays. *Diabetes* 50:909-20, 2001.

## **Tables**

**Table S1. Primers sequences for RT-PCR**

| <b>GENE</b>          | <b>Forward (5'-3')</b> | <b>Reverse (5'-3')</b>  |
|----------------------|------------------------|-------------------------|
| <b>Aequorin</b>      | ACTTCGACAACCCAAGATGG   | ATACGGATGAGCGTTTC       |
| <b>PMCA2</b>         | AAGGAGACATATGGGGAC     | TTCACCTTCATCTTCTGC      |
| <b>Beta-actin</b>    | GTTTGAGACCTTCAACACCCCA | CGGATGTCAACGTCACACTTCA  |
| <b>CHOP</b>          | CCAGCAGAGGTCACAAGCAC   | CGCACTGACCACTCTGTTTC    |
| <b>Spliced XBP-1</b> | GAGTCCGCAGCAGGTG       | GCGTCAGAATCCATGGGA      |
| <b>BiP</b>           | CCACCAGGATGCAGACATTG   | AGGGCCTCCACTTCCATAGA    |
| <b>Calnexin</b>      | CTTCCTCCCTCAAGGTTCTAT  | CATGATTGGCAGTTCTACCTACT |
| <b>Calbindin</b>     | AAGGAAAACAAGACCGTGGAT  | CATCTCTGTCAGCTCCAGCTT   |
| <b>Calreticulin</b>  | AGATTCGAACCCTTCAGCAA   | GGAAACAGCTTCACGTAGCC    |
| <b>GAPDH</b>         | AGTTCAACGGCACAGTCAAG   | TACTCAGCACCAGCATCACC    |
| <b>Caspase 12</b>    | GCGAGCTTAATCCTGAGCAA   | GGCAATGTGACCTGCAAATA    |

**Table S2. Doubling time of clones transfected or not with aequorin and/or PMCA2.**

| <b>Cell clone</b> | <b>Doubling time (h)</b> |
|-------------------|--------------------------|
| Ctrl              | <i>22.4±0.38</i>         |
| Cyt-Aeq           | <i>24.8±2.04</i>         |
| Mit-Aeq           | <i>24.9±1.93</i>         |
| PMCA2-C12         | <i>29.2±0.88 **</i>      |
| PMCA2-C15         | <i>25.8±1.13</i>         |
| Cyt-Aeq-C12       | <i>29.3±1.36 *</i>       |
| Cyt-Aeq-C15       | <i>24.6±0.94</i>         |
| Mit-Aeq-C12       | <i>28.6±1.43 *</i>       |
| Mit-Aeq-C15       | <i>25.8±1.40</i>         |

\*  $P>0.05$  vs Ctrl; \*\*  $P<0.01$  vs Ctrl.

## Figures

### Legend of figures

**Figure S1 : Effect of KCl (50 mM) on  $[Ca^{2+}]_i$  and  $[Ca^{2+}]_m$  in control and vector-transfected cells**

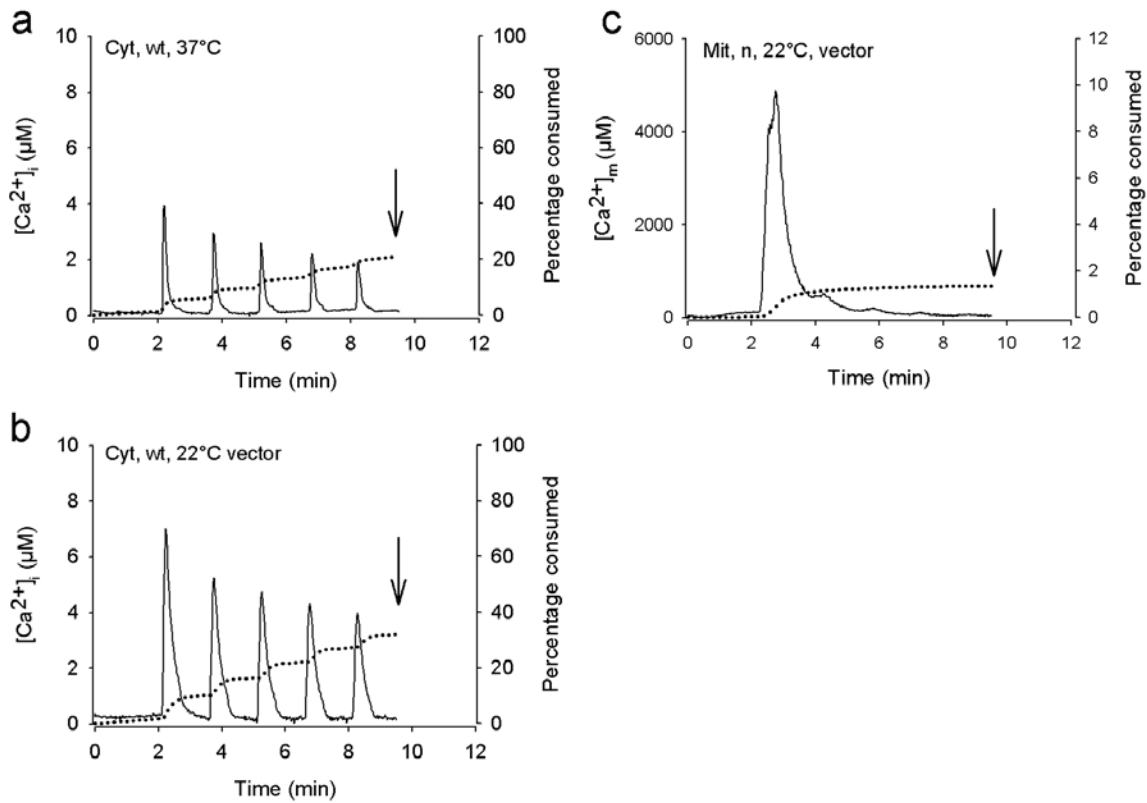

Same protocol as in Figure 1.

Panel a. Wild type or cytosolic aequorin (Cyt) was reconstituted with wild type coelenterazine (wt) in control non transfected cells and the experiment was carried out at 37°C. The first  $[Ca^{2+}]_i$  peak value averaged  $3.48 \pm 0.25 \mu M$ .

Panel b. Wild type or cytosolic aequorin (Cyt) was reconstituted with wild type coelenterazine (wt) in vector-transfected cells and the experiment was carried out at 22°C.

Panel c. Mutated or mitochondrial aequorin (Mit) was reconstituted with n coelenterazine (n) in vector-transfected cells and the experiment was carried out at 22°C.

The curves shown are representative of 8 individual experiments in each case.

**Figure S2. Effect of PMCA2 overexpression on glucose (11.1 mM)-induced increase in  $[Ca^{2+}]_i$  and  $[Ca^{2+}]_m$**

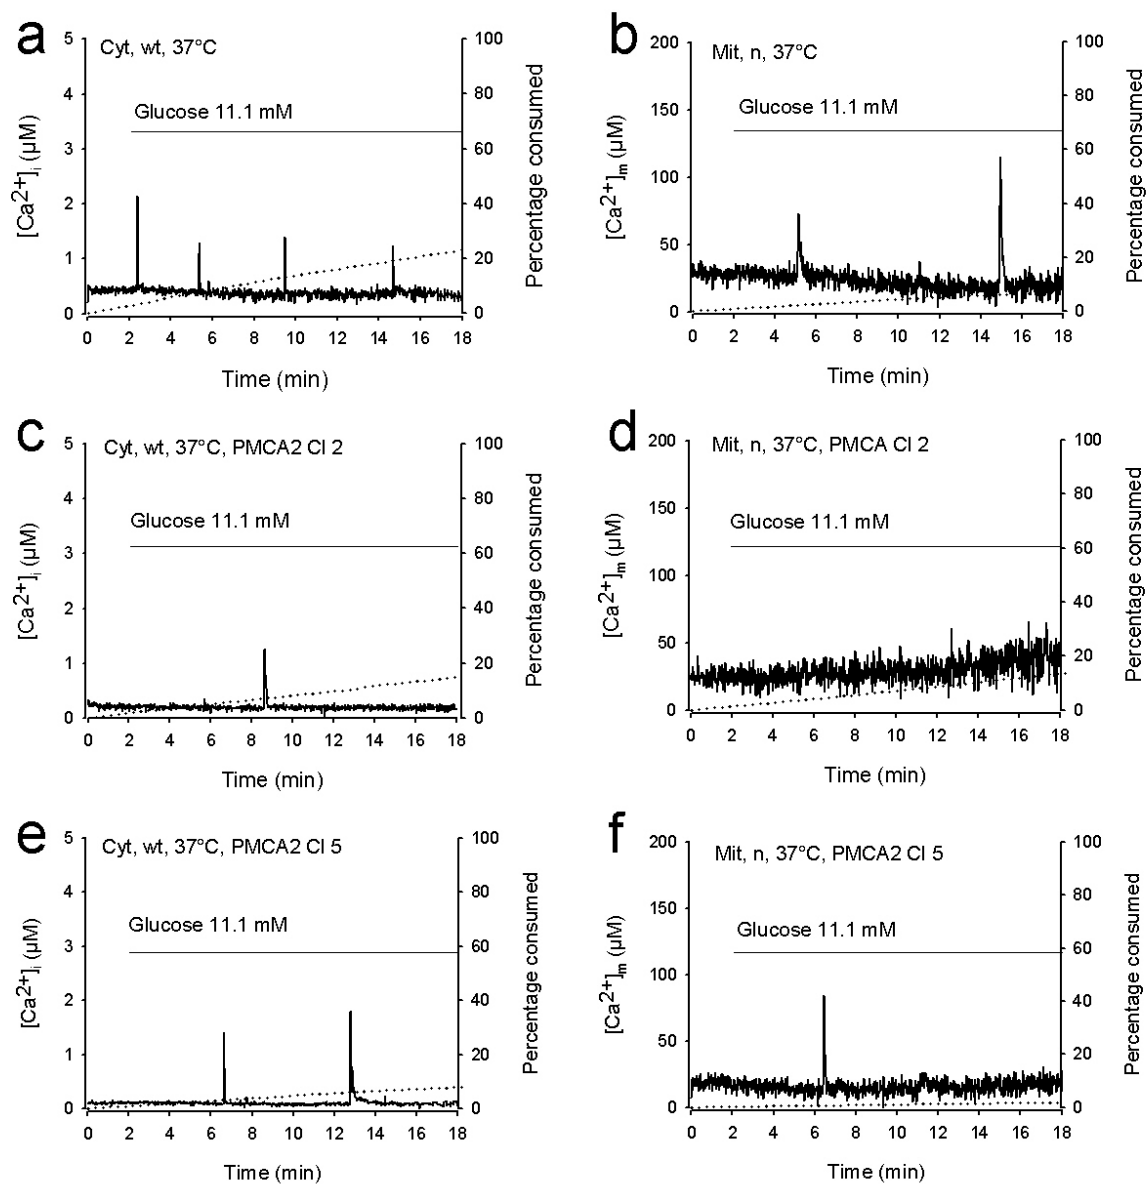

Left panels: Wild type aequorin (Cyt) was reconstituted with wild type coelenterazine (wt) in control non transfected cells (panel a) and in PMCA2-transfected cells, clone 2 (Cl 2, panel c), clone 5 (Cl 5, panel e). The experiments were carried out at 37°C and the exposure to the sugar was continuous (from min 2 to the end of the experiment)

Right panels Mutated aequorin (Mit) was reconstituted with n coelenterazine (n) in control non transfected cells (panel b) and in PMCA2-transfected cells, clone 2 (Cl 2, panel d), clone 5 (Cl 5, panel f). The experiments were carried out at 37°C and the exposure to the sugar was continuous (from min 2 to the end of the experiment). In control cells and clone 5 of PMCA2-overexpressing cells the number of spikes measured were  $2.06 \pm 0.17$  and  $1.28 \pm 0.29$ , respectively ( $P < 0.05$ ) while the values for the largest spikes were  $162.32 \pm 16.96 \mu\text{M}$  and  $53.30 \pm 8.45 \mu\text{M}$ ,  $P < 0.001$ ).

The curves shown are representative of 8 individual experiments in each case.

**Figure S3. Effect of glucose (11.1 mM)-induced increase in  $[Ca^{2+}]_i$**

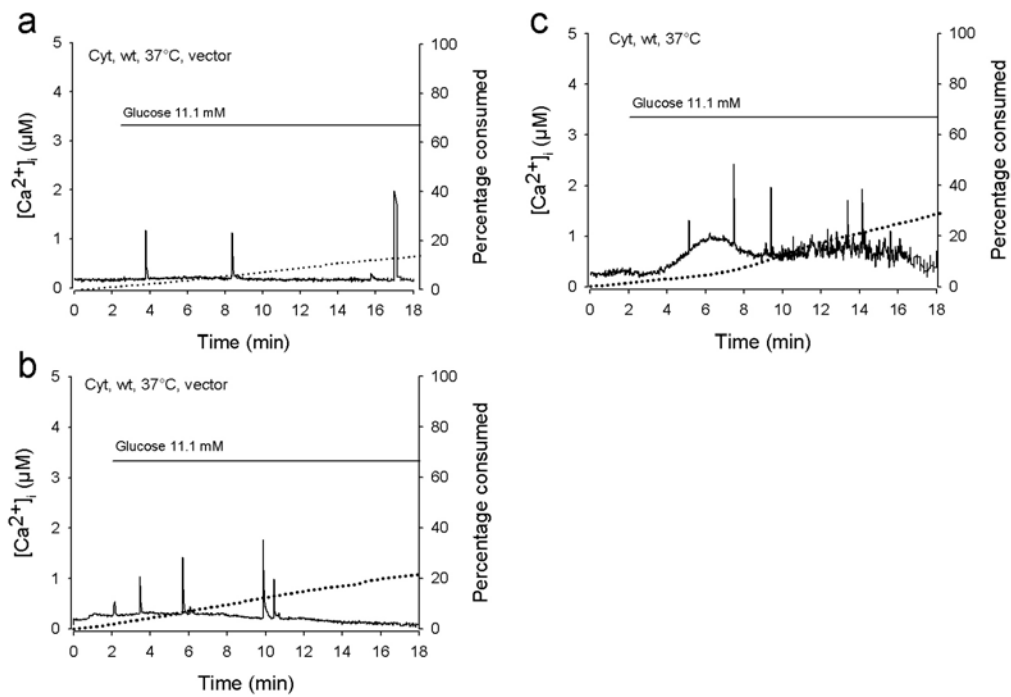

Wild type aequorin (Cyt) was reconstituted with wild type coelenterazine (wt) in vector-transfected cells (panel a and b) and control non-transfected cells (panel c), the experiments were carried out at 37°C and the exposure to the sugar was continuous (from min 2 to the end of the experiment).

Panel a: the curve shown is representative of 8 individual experiments.

Panel b and c : individual experiments showing a rise in baseline value in response to glucose.

**Figure S4. Effect of PMCA2 overexpression on caspase 12 cleavage and mitochondrial activity.**

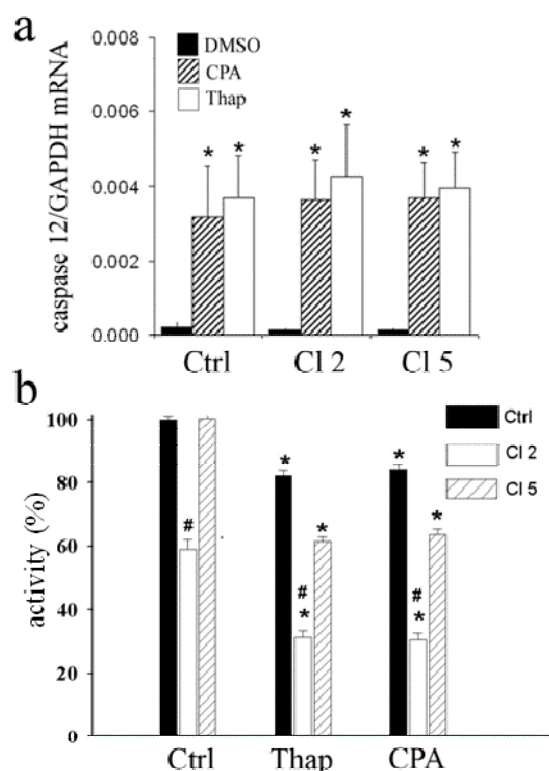

Panel a: Caspase 12 cleavage. BD-Brin11 cells (ctrl) or two cells-lines overexpressing PMCA2: Cl 5 and Cl 2 were treated or not (black bars) for 24h with CPA (stripe bars) or thapsigargin (white bars). Data represent expression of caspase 12 normalized per GAPDH expression. Results are means  $\pm$  SEM of four independent experiments.

Panel b: mitochondrial activity. The MTT assay was used to measure mitochondrial activity. Closed columns: non-transfected cells; open columns: PMCA2-transfected cells (clone 2: Cl 2); hatched columns: (clone 5: Cl 5). First group of columns : untreated cells; second and third group of columns in the presence of thapsigargin (1  $\mu$ M) and cyclopiazonic acid (CPA, 25  $\mu$ M). Data are given as means  $\pm$  SEM from 5 individual experiments comprising each at least 4 replicates. \*P<0.05 vs. respective non-treated condition. #P<0.05 vs. respective non-transfected Brin-BD11 (Ctrl).

**Figure S5 : Mitochondrial membrane potential**

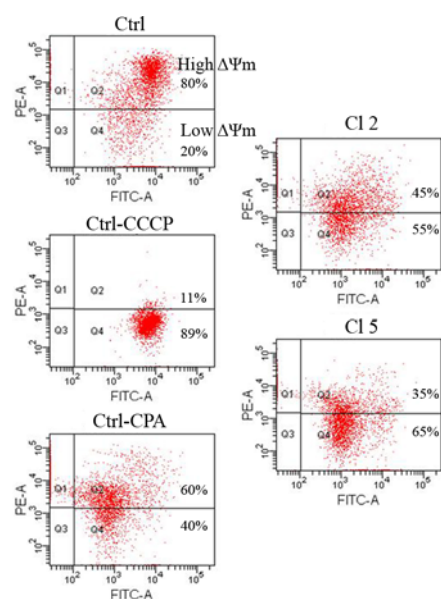

BD-Brin11 cells (Ctrl) or PMCA2-overexpressing cells (Cl 2 and 5) were treated or not for 24h with CPA or for 30min with CCCP. The cell's  $\Delta\Psi_m$  was determined by fluocytometry in cells stained with the DePsipher dye. Two population of high and low  $\Delta\Psi_m$  were separated using the positive control (CCCP-treated cells) condition. Data are representative of 3 independent experiments.

**Figure S6. Bax Translocation and cyt c release.**

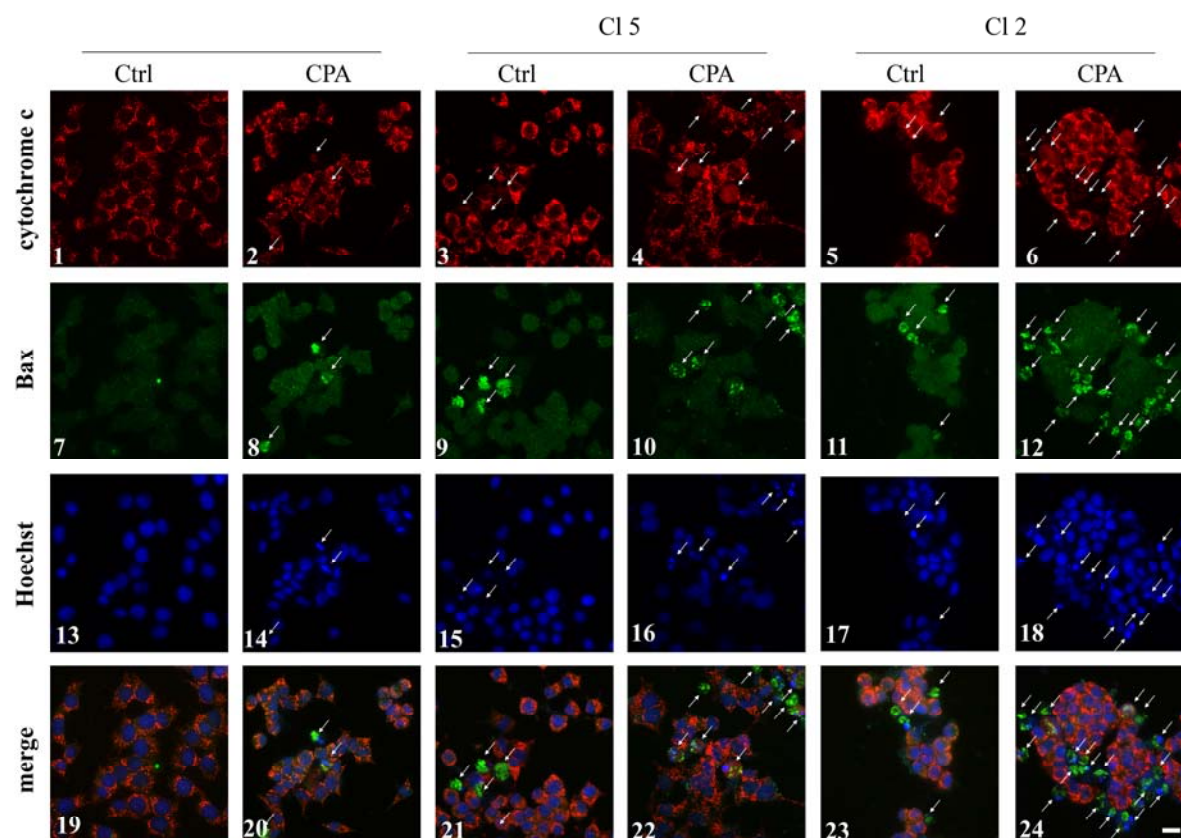

BD-Brin11 cells (Ctrl) or cells transfected with PMCA2 (Cl 2 and Cl 5) were treated or not for 24h with CPA (50 $\mu$ M). Cells were stained using anti- cytochrome c (panels 1-6) and Bax (panels 7-12) and counterstained with Hoechst (panels 13-18).

Panels 1-6: Arrows indicate cells that have lost mitochondrial cytochrome c staining.

Panels 7-12: arrows indicate cells with Bax mitochondrial staining, as opposed to normal cytosolic staining.

Panels 13-18: arrows indicate typical apoptotic nuclei or cells which have lost DNA staining.

Panels 19-24: Merged image of cytochrome c, Bax and Hoechst staining.

Representative fields of f experiments (the white tab stands for 40  $\mu$ m).
